# Supplementary material for: Estimating Parameters of Speciation Models Based on Refined Summaries of the Joint Site-Frequency Spectrum
Source: PubMed Central journal article supplement (PMC3102651; doi:10.1371/journal.pone.0018155), 2011-05-26
Supplement: pone.0018155.s001.pdf [file pone.0018155.s001.pdf]

## **Appendix S1: Supplementary Informations**

### **Content**

*Section 1: Four classes of the Joint-Frequency Spectrum for the Wakeley-Hey model.*

*Section 2: Summaries of the Joint-Frequency Spectrum for the Maximum-Likelihood method*

*Section 3: Summaries of the Joint-Frequency Spectrum for the Composite likelihoods methods*

*Section 4: Results of regression between error in estimates of divergence times and error in migration rates depending on the method.*

*Section 5: Analysis of variance for error in estimates of divergence times and error in migration rates depending on the method and other parameters.*

*Section 6: Results of the 100 datasets analysis: Factor 2, error in estimates of divergence times and errors in migration rates depending on the method and parameters.*

Section 1: Four classes of the Joint-Frequency Spectrum for the Wakeley-Hey model.

The Joint site-Frequency Spectrum (JSFS) compares SNP data from  $n_1$  samples from population 1 to  $n_2$  samples from population 2. The JSFS is calculated as an array of dimension  $(n_1 + 1) \times (n_2 + 1) - 2$ . A cell at row  $i$  and column  $j$  contains the number of polymorphic sites  $S_{i,j}$  which are found  $i$  times in population 1 and  $j$  times in population 2. For example,  $S_{2,3} = 10$  if 10 polymorphisms are found as doubletons in population 1 and tripletons in population 2. Four summary statistics are relevant for isolation-migration parameter inference: private polymorphisms in species 1 and 2, respectively ( $W_1, W_2$ ), fixed differences between species ( $W_3$ ), and shared ancestral polymorphisms ( $W_4$ ) (Wakeley and Hey 1997, see reference 19 in text).

$$W_1 = \sum_{1 \leq i \leq n_1 - 1} S_{i,0} + S_{i,n_2}; \quad W_2 = \sum_{1 \leq j \leq n_2 - 1} S_{0,j} + S_{n_1,j}; \quad W_3 = S_{0,n_2} + S_{n_1,0}; \quad W_4 = \sum_{1 \leq i \leq n_1 - 1} \sum_{1 \leq j \leq n_2 - 1} S_{i,j}$$

We represent the JSFS graphically, as well as the four different classes  $W_{1-4}$  as follows:

|         | 0     | 1     | 2 | 3 | ... | $n_2-3$ | $n_2-2$ | $n_2-1$ | $n_2$ |
|---------|-------|-------|---|---|-----|---------|---------|---------|-------|
| 0       | X     | $W_2$ |   |   |     |         |         |         | $W_3$ |
| 1       | $W_1$ | $W_4$ |   |   |     |         |         |         | $W_1$ |
| 3       |       |       |   |   |     |         |         |         |       |
| ...     |       |       |   |   |     |         |         |         |       |
| $n_1-3$ |       |       |   |   |     |         |         |         |       |
| $n_1-2$ |       |       |   |   |     |         |         |         |       |
| $n_1-1$ | $W_2$ |       |   |   |     |         |         | X       |       |
| $n_1$   |       |       |   |   |     |         |         |         | $W_3$ |

Section 2: Summaries of the Joint-Frequency Spectrum for the Maximum-Likelihood method

We have tested four different sets of summary statistics derived from the JSFS. The four vectors of summary statistics are described below as  $D, D', D'', D^*$ .

Formally, the 7 values of vector  $D$  are written as:

$$D_1 = \sum_{1 \leq i \leq n_1 - 1} S_{i,0}; \quad D_2 = \sum_{1 \leq j \leq n_2 - 1} S_{0,j};$$

$$D_3 = S_{0,n_2}; \quad D_4 = S_{n_1,0};$$

$$D_5 = \sum_{1 \leq i \leq n_1 - 1} \sum_{1 \leq j \leq n_2 - 1} S_{i,j};$$

$$D_6 = \sum_{1 \leq i \leq n_1 - 1} S_{i,n_2}; \quad D_7 = \sum_{1 \leq j \leq n_2 - 1} S_{n_1,j}$$

In relation to Eq. 2,  $W_1 = D_1 + D_6$ ,  $W_2 = D_2 + D_7$ ,  $W_3 = D_3 + D_4$  and  $W_4 = D_5$ . In other words,  $W_1 = D_1 + D_6$  means that we separate polymorphic SNPs in population 1 which are not found in population 2 from those that are fixed in population 2 (i.e. polarizing the private polymorphism using information from an outgroup). As above, we represent graphically the JSFS and the classes of vector  $D$  as follows:

|         | 0     | 1     | 2 | 3 | ... | $n_2-3$ | $n_2-2$ | $n_2-1$ | $n_2$ |
|---------|-------|-------|---|---|-----|---------|---------|---------|-------|
| 0       | X     | $D_2$ |   |   |     |         |         |         | $D_3$ |
| 1       | $D_1$ | $D_5$ |   |   |     |         |         |         |       |
| 2       |       |       |   |   |     |         |         |         |       |
| 3       |       |       |   |   |     |         |         |         |       |
| ...     |       |       |   |   |     |         |         |         |       |
| $n_1-3$ |       |       |   |   |     |         |         |         |       |
| $n_1-2$ |       |       |   |   |     |         |         |         |       |
| $n_1-1$ | $D_4$ | $D_7$ |   |   |     |         |         |         | X     |
| $n_1$   |       |       |   |   |     |         |         |         |       |

The second decomposition  $D_k'$  ( $k=1,\dots,12$ ) is based on extracting the number of singletons from various classes of  $D$ .

$$D'_1 = S_{0,1}; D'_2 = \sum_{2 \leq i \leq n_1-1} S_{i,0}; D'_3 = S_{1,0}; D'_4 = \sum_{2 \leq j \leq n_2-1} S_{0,j};$$

$$D'_5 = S_{0,n_2}; D'_6 = S_{n_1,0}; D'_7 = S_{1,1}; D'_8 = S_{1,n_2}; D'_9 = S_{n_1,1}$$

$$D'_{10} = \sum_{2 \leq i \leq n_1-1} \sum_{2 \leq j \leq n_2-1} S_{i,j}; D'_{11} = \sum_{2 \leq i \leq n_1-1} S_{i,n_2}; D'_{12} = \sum_{2 \leq j \leq n_2-1} S_{n_1,j}$$

|         | 0      | 1         | 2         | 3 | ... | $n_2-3$ | $n_2-2$ | $n_2-1$   | $n_2$  |
|---------|--------|-----------|-----------|---|-----|---------|---------|-----------|--------|
| 0       | X      | $D'_1$    | $D'_4$    |   |     |         |         |           | $D'_5$ |
| 1       | $D'_3$ | $D'_7$    |           |   |     |         |         |           | $D'_8$ |
| 2       | $D'_2$ |           |           |   |     |         |         | $D'_{11}$ |        |
| 3       |        |           |           |   |     |         |         |           |        |
| ...     |        | $D'_{10}$ |           |   |     |         |         |           |        |
| $n_1-3$ |        |           |           |   |     |         |         |           |        |
| $n_1-2$ |        |           |           |   |     |         |         |           |        |
| $n_1-1$ |        |           |           |   |     |         |         |           |        |
| $n_1$   | $D'_6$ | $D'_9$    | $D'_{12}$ |   |     |         |         |           | X      |

The third decomposition  $D_k''(k=1,\dots,12)$  contains low frequency polymorphism defined by singletons and doubletons from various classes of  $D$ .

$$D_1'' = S_{0,1} + S_{0,2}; \quad D_2'' = \sum_{3 \leq i \leq n_1 - 1} S_{i,0}; \quad D_3'' = S_{1,0} + S_{2,0}; \quad D_4'' = \sum_{3 \leq j \leq n_2 - 1} S_{0,j};$$

$$D_5'' = S_{0,n_2}; \quad D_6'' = S_{n_1,0}; \quad D_7'' = S_{1,1} + S_{1,2} + S_{2,1} + S_{2,2}; \quad D_8'' = S_{1,n_2} + S_{2,n_2}; \quad D_9'' = S_{n_1,1} + S_{n_1,2}$$

$$D_{10}'' = \sum_{3 \leq i \leq n_1 - 1} \sum_{3 \leq j \leq n_2 - 1} S_{i,j}; \quad D_{11}'' = \sum_{3 \leq i \leq n_1 - 1} S_{i,n_2}; \quad D_{12}'' = \sum_{3 \leq j \leq n_2 - 1} S_{n_1,j}$$

|         | 0       | 1       | 2 | 3          | ... | $n_1-3$ | $n_1-2$ | $n_1-1$ | $n_1$   |
|---------|---------|---------|---|------------|-----|---------|---------|---------|---------|
| 0       | X       | $D''_1$ |   | $D''_4$    |     |         |         |         | $D''_5$ |
| 1       | $D''_3$ | $D''_7$ |   | $D''_{10}$ |     |         |         |         | $D''_8$ |
| 2       |         |         |   |            |     |         |         |         |         |
| 3       |         |         |   |            |     |         |         |         |         |
| ...     |         |         |   |            |     |         |         |         |         |
| $n_1-3$ |         |         |   |            |     |         |         |         |         |
| $n_1-2$ |         |         |   |            |     |         |         |         |         |
| $n_1-1$ |         |         |   |            |     |         |         |         |         |
| $n_1$   | $D''_6$ | $D''_9$ |   | $D''_{11}$ |     |         |         |         | X       |

The fourth decomposition, the vector  $D_k^*$  ( $k=1,\dots,23$ ), contains singletons and doubletons in separate classes.

$$D_1^* = S_{0,1}; D_2^* = S_{0,2}; D_3^* = \sum_{3 \leq j \leq n_2-1} S_{0,j}; D_4^* = \sum_{3 \leq i \leq n_1-1} S_{i,0};$$

$$D_5^* = S_{1,0}; D_6^* = S_{1,1}; D_7^* = S_{1,2}; D_8^* = S_{2,0}; D_9^* = S_{2,1}; D_{10}^* = S_{2,2};$$

$$D_{11}^* = S_{0,n_2}; D_{12}^* = S_{1,n_2}; D_{13}^* = S_{2,n_2}; D_{14}^* = S_{n_1,0}; D_{15}^* = S_{n_1,1}; D_{16}^* = S_{n_1,2};$$

$$D_{17}^* = \sum_{3 \leq j \leq n_2-1} S_{1,j}; D_{18}^* = \sum_{3 \leq j \leq n_2-1} S_{2,j}; D_{19}^* = \sum_{3 \leq i \leq n_1-1} S_{i,1}; D_{20}^* = \sum_{3 \leq i \leq n_1-1} S_{i,2};$$

$$D_{21}^* = \sum_{3 \leq i \leq n_1-1} \sum_{3 \leq j \leq n_2-1} S_{i,j}; D_{22}^* = \sum_{3 \leq i \leq n_1-1} S_{i,n_2}; D_{23}^* = \sum_{3 \leq j \leq n_2-1} S_{n_1,j}$$

|         | 0          | 1          | 2          | 3          | ... | $n_2-3$ | $n_2-2$ | $n_2-1$ | $n_2$      |
|---------|------------|------------|------------|------------|-----|---------|---------|---------|------------|
| 0       | X          | $D^*_1$    | $D^*_2$    | $D^*_3$    |     |         |         |         | $D^*_{11}$ |
| 1       | $D^*_5$    | $D^*_6$    | $D^*_7$    | $D^*_{17}$ |     |         |         |         | $D^*_{12}$ |
| 2       | $D^*_8$    | $D^*_9$    | $D^*_{10}$ | $D^*_{18}$ |     |         |         |         | $D^*_{13}$ |
| 3       | $D^*_4$    | $D^*_{19}$ | $D^*_{20}$ | $D^*_{21}$ |     |         |         |         | $D^*_{22}$ |
| ...     |            |            |            |            |     |         |         |         |            |
| $n_1-3$ |            |            |            |            |     |         |         |         |            |
| $n_1-2$ |            |            |            |            |     |         |         |         |            |
| $n_1-1$ |            |            |            |            |     |         |         |         |            |
| $n_1$   | $D^*_{14}$ | $D^*_{15}$ | $D^*_{16}$ | $D^*_{23}$ |     |         |         |         | X          |

Section 3: Summaries of the Joint-Frequency Spectrum for the Composite-Likelihood analysis  
method

Here we consider singletons, doubletons, and polymorphic sites with high frequencies  $n_1 - 1$  and  $n_1 - 2$  in population 1 or  $n_2 - 1$  and  $n_2 - 2$  in population 2 ( $\check{D}_k, k=1, \dots, 23$ ) separately.

$$\begin{aligned} \check{D}_1 &= S_{1,0} + S_{2,0}; \check{D}_2 = \sum_{3 \leq i \leq n_1 - 3} S_{i,0}; \check{D}_3 = S_{n_1 - 2,0} + S_{n_1 - 1,0}; \check{D}_4 = S_{n_1,0}; \\ \check{D}_5 &= S_{0,1} + S_{0,2}; \check{D}_6 = S_{1,1} + S_{2,1} + S_{1,2} + S_{2,2}; \check{D}_7 = \sum_{3 \leq i \leq n_1 - 3} S_{i,1} + \sum_{3 \leq i \leq n_1 - 3} S_{i,2}; \\ \check{D}_8 &= S_{n_1 - 2,1} + S_{n_1 - 1,1} + S_{n_1 - 2,2} + S_{n_1 - 1,2}; \check{D}_9 = S_{n_1,1} + S_{n_1,2}; \check{D}_{10} = \sum_{3 \leq j \leq n_2 - 3} S_{0,j}; \\ \check{D}_{11} &= \sum_{3 \leq j \leq n_2 - 3} S_{1,j} + \sum_{3 \leq j \leq n_2 - 3} S_{2,j}; \check{D}_{12} = \sum_{3 \leq i \leq n_1 - 3} \sum_{3 \leq j \leq n_2 - 3} S_{i,j}; \check{D}_{13} = \sum_{3 \leq j \leq n_2 - 3} S_{n_1 - 2,j} + \sum_{3 \leq j \leq n_2 - 3} S_{n_1 - 1,j}; \\ \check{D}_{14} &= \sum_{3 \leq j \leq n_2 - 3} S_{n_1,j}; \check{D}_{15} = S_{0,n_2 - 2} + S_{0,n_2 - 1}; \check{D}_{16} = S_{1,n_2 - 2} + S_{1,n_2 - 1} + S_{2,n_2 - 2} + S_{2,n_2 - 1}; \\ \check{D}_{17} &= \sum_{3 \leq i \leq n_1 - 3} S_{i,n_2 - 2} + \sum_{3 \leq i \leq n_1 - 3} S_{i,n_2 - 1}; \check{D}_{18} = S_{n_1 - 2,n_2 - 2} + S_{n_1 - 2,n_2 - 1} + S_{n_1 - 1,n_2 - 2} + S_{n_1 - 1,n_2 - 1}; \\ \check{D}_{19} &= S_{n_1,n_2 - 2} + S_{n_1,n_2 - 1}; \check{D}_{20} = S_{0,n_2}; \check{D}_{21} = S_{1,n_2} + S_{2,n_2}; \check{D}_{22} = \sum_{3 \leq i \leq n_1 - 3} S_{i,n_2}; \check{D}_{23} = S_{n_1 - 2,n_2} + S_{n_1 - 1,n_2} \end{aligned}$$

For a simple model with equal mutation rates in the two populations ( $\theta_1 = \theta_2$ ) and equal gene flow rates ( $M_{12} = M_{21}$ ), we verify by coalescent simulations of the Wakeley-Hey model that the JSFS shows an axis of symmetry along the diagonal (0,0) to  $(n_1, n_2)$ . In this case, symmetry also appears among elements of the  $J$  vector, namely:  $\check{D}_1 = \check{D}_5$ ,  $\check{D}_2 = \check{D}_{10}$ ,  $\check{D}_3 = \check{D}_{15}$ ,  $\check{D}_4 = \check{D}_{20}$ ,  $\check{D}_7 = \check{D}_{11}$ ,  $\check{D}_8 = \check{D}_{16}$ ,  $\check{D}_9 = \check{D}_{21}$ ,  $\check{D}_{13} = \check{D}_{17}$ ,  $\check{D}_{14} = \check{D}_{22}$ ,  $\check{D}_{19} = \check{D}_{23}$ . This means that the number of sites with a mutation fixed in population 1 and absent in population 2 ( $\check{D}_4$ ) is equal to the number of mutations fixed in population 2 and absent in population 1 ( $\check{D}_{20}$ ).

|         | 0             | 1             | 2                | 3 | ... | $n_1-3$          | $n_1-2$          | $n_1-1$ | $n_1$ |  |
|---------|---------------|---------------|------------------|---|-----|------------------|------------------|---------|-------|--|
| 0       | X             | $\check{D}_5$ | $\check{D}_{10}$ |   |     | $\check{D}_{15}$ | $\check{D}_{20}$ |         |       |  |
| 1       | $\check{D}_1$ | $\check{D}_6$ | $\check{D}_{11}$ |   |     | $\check{D}_{16}$ | $\check{D}_{21}$ |         |       |  |
| 2       |               |               |                  |   |     |                  |                  |         |       |  |
| 3       | $\check{D}_2$ | $\check{D}_7$ | $\check{D}_{12}$ |   |     | $\check{D}_{17}$ | $\check{D}_{22}$ |         |       |  |
| ...     |               |               |                  |   |     |                  |                  |         |       |  |
| $n_1-3$ |               |               |                  |   |     |                  |                  |         |       |  |
| $n_1-2$ | $\check{D}_3$ | $\check{D}_8$ | $\check{D}_{13}$ |   |     | $\check{D}_{18}$ | $\check{D}_{23}$ |         |       |  |
| $n_1-1$ |               |               |                  |   |     |                  |                  |         |       |  |
| $n_1$   | $\check{D}_4$ | $\check{D}_9$ | $\check{D}_{14}$ |   |     | $\check{D}_{19}$ | X                |         |       |  |

Section 4: Relative of error in estimates of divergence times and error in migration rates depending on the method.

Figure S1a and b present the results of the power analysis for sets of 7 loci with 20 replicates (results in text in Figures 1-2), for given values of  $\theta$  and  $\rho$ . Note that method  $J_1$  has 8 possible estimated values (the means of each block) for  $\tau$  and  $M$ . In these datasets where  $\tau = 0.1$ , only three values for the divergence time were estimated. The value of  $\tau = 0.13954$  (relative error = 0.39541, black rectangle in Figure S1a) was the most frequently estimated value with 111 occurrences over the 140 datasets using method  $J_1$ .

In Figure S2, for all nine methods, positive correlations are found between the relative bias in estimates of divergence time and migration rates. This means that when a method over (under)-estimates the divergence time, it also over (under)-estimates the migration rate.

Section 5: Analysis of variance for error in estimates of divergence times and error in migration rates depending on the method and other parameters.

The analysis of variance was performed using the *glm* function, and multiple mean comparisons are based on Tukey's HSD test (confirmed by Bonferroni test) as implemented in the R software (R DEVELOPMENT CORE TEAM 2005). Groups of significance for the multiple comparison tests are shown on Figure S1a. In the *glm* function we use the option: family = Gaussian. We considered all possible two way and three way interaction terms between the different parameters (Method,  $\theta$ ,  $\rho$ ,  $M$ ), and sequentially remove non-significant interactions. P-values for single parameters and the interaction term Method\* $\theta$  are similar to those of Table S1 when only those four terms are considered in the ANOVA formula. Here we show the significance (or non-significance) of interesting interactions for the behavior of the different methods (Method=  $D_1$ - $D_4$ , MIMAR,  $J_1$ - $J_4$ ).

The analysis of variance was performed using the *glm* function, and multiple mean comparisons are based on Tukey's HSD test (confirmed by Bonferroni test) as implemented in the R software (R DEVELOPMENT CORE TEAM 2005). Groups of significance for the multiple comparison tests are shown on Figure S1b. In the *glm* function we use the option: family = Gaussian.

Tellier et al.

We considered all possible two way and three way interaction terms between the different parameters (Method,  $\theta$ ,  $\rho$ ,  $M$ ), and sequentially removed non-significant interactions. P-values for single parameters and the interaction term  $\theta^*M$  are similar to those of Table S2 when only those four terms are considered in the ANOVA formula. Here we show the significance (or non-significance) of interesting interactions for the behavior of the different methods (Method= D<sub>1</sub>-D<sub>4</sub>, MIMAR, J<sub>1</sub>-J<sub>4</sub>).

*Section 6: Results of the 100 datasets analysis: Factor 2, error in estimates of divergence times and errors in migration rates depending on the method and other parameters.*

Figures S6 and S7 highlight the absence of any clear correlation between error in estimating WH parameters and the population size ( $\theta$ ) or the recombination rate ( $\rho$ ). These conclusions are valid for all composite-likelihood methods and popABC results.

Figures S7 and S8 show that estimates of migration rates are less accurate for recent divergence times ( $\tau < 0.5$ ; difference in scale of the y-axes in Figures S8a and S9a, S8b and S9b). Moreover, with composite methods J<sub>2</sub> and J<sub>4</sub>, high migration rates can be better estimated (have little relative error) even with recent divergence ( $< 0.5$ ; Figures S8a and S9a). However, we do not find the same trend for popABC (Figure S10), showing the inaccuracy of estimating migration rates with this method independent of divergence.
