# Supplementary material for: Estimating Parameters of Speciation Models Based on Refined Summaries of the Joint Site-Frequency Spectrum
Source: PubMed Central journal article supplement (PMC3102651; doi:10.1371/journal.pone.0018155), 2011-05-26
Supplement: pone.0018155.s013.pdf [file pone.0018155.s013.pdf]

**Table S1:** ANOVA table of analysis of error in the estimation of divergence times ( $\tau$ ).

|                                     | Df   | Sum of squares | Mean Square | F value | p-value    |
|-------------------------------------|------|----------------|-------------|---------|------------|
| Method                              | 8    | 39.656         | 4.957       | 24.566  | <0.0001*** |
| $\theta$ (population mutation rate) | 1    | 1.897          | 1.897       | 9.4     | <0.01**    |
| $\rho$ (recombination rate)         | 1    | 0.126          | 0.126       | 0.626   | 0.429      |
| $M$ (migration rate)                | 1    | 0.431          | 0.431       | 2.137   | 0.144      |
| Method* $\theta$                    | 8    | 6.993          | 0.874       | 4.332   | <0.0001*** |
| Method* $\rho$                      | 8    | 0.748          | 0.094       | 0.463   | 0.882      |
| Method* $M$                         | 8    | 2.656          | 0.332       | 1.645   | 0.107      |
| $\theta * M$                        | 1    | 0.261          | 0.261       | 1.292   | 0.256      |
| Method * $\theta$ * $M$             | 8    | 0.916          | 0.115       | 0.567   | 0.805      |
| Residuals                           | 1195 | 294.811        | 0.247       |         |            |
