# Supplementary material for: Estimating Parameters of Speciation Models Based on Refined Summaries of the Joint Site-Frequency Spectrum
Source: PubMed Central journal article supplement (PMC3102651; doi:10.1371/journal.pone.0018155), 2011-05-26
Supplement: pone.0018155.s014.pdf [file pone.0018155.s014.pdf]

**Table S2:** ANOVA table of analysis of error in the estimation of migration rates ( $M_{12}=M_{21}$ ).

|                                     | Df   | Sum of squares | Mean Square | F value | p-value    |
|-------------------------------------|------|----------------|-------------|---------|------------|
| Method                              | 8    | 127.58         | 15.948      | 16.093  | <0.0001*** |
| $\theta$ (population mutation rate) | 1    | 0.54           | 0.54        | 0.540   | 0.463      |
| $\rho$ recombination rate)          | 1    | 2.18           | 2.18        | 2.205   | 0.138      |
| $M$ (migration rate)                | 1    | 10.72          | 10.72       | 10.822  | <0.01**    |
| Method* $\theta$                    | 8    | 7.40           | 0.925       | 0.934   | 0.487      |
| Method* $\rho$                      | 8    | 9.60           | 1.2         | 1.21    | 0.288      |
| Method* $M$                         | 8    | 5.51           | 0.689       | 0.696   | 0.696      |
| $\theta * M$                        | 1    | 4.72           | 4.72        | 4.763   | 0.029*     |
| Method * $\theta * M$               | 8    | 4.48           | 0.56        | 0.565   | 0.807      |
| Residuals                           | 1195 | 1356.9         | 1.136       |         |            |
